# Supplementary material for: Amphiphilic and Perfluorinated Poly(3-Hydroxyalkanoate) Nanocapsules for 19F Magnetic Resonance Imaging
Source: MDPI journal article supplement (doi:10.3390/bioengineering8090121), 2021-09-09
Supplement: s1 [file s1]

Supplementary Materials

# Amphiphilic and Perfluorinated Poly(3-Hydroxyalkanoate) Nanocapsules for $^{19}\text{F}$ Magnetic Resonance Imaging

Marion Le Gal <sup>1,2</sup>, Estelle Renard <sup>2</sup>, Christelle Simon-Colin <sup>1</sup>, Benoit Larrat <sup>3</sup> and Valérie Langlois <sup>2,\*</sup>

<sup>1</sup> Laboratoire de Microbiologie des Environnements Extrêmes, CNRS, Ifremer, University Brest, F-29280 Plouzané, France; mlegal@ifremer.fr (M.L.G.); christelle.simon.colin@ifremer.fr (C.S.-C.)

<sup>2</sup> University Paris Est Creteil, CNRS, ICMPE, F-94010 Creteil, France; renard@icmpe.cnrs.fr

<sup>3</sup> Université Paris-Saclay, CEA, CNRS, NeuroSpin, 91191 Gif-sur-Yvette, France; benoit.larrat@cea.fr

\* Correspondence: langlois@u-pec.fr

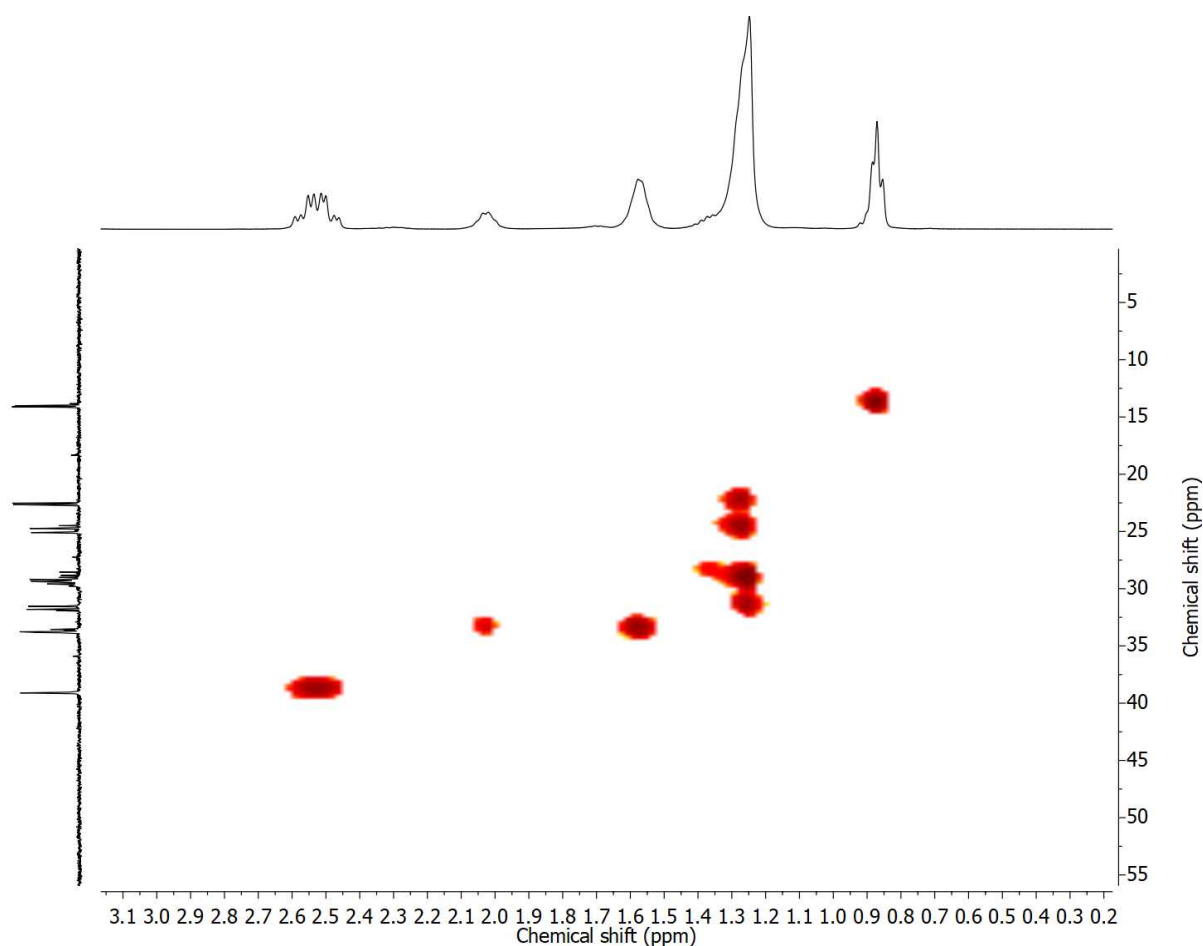

Figure S1. HSQC spectrum of PHAU in  $\text{CDCl}_3$ .

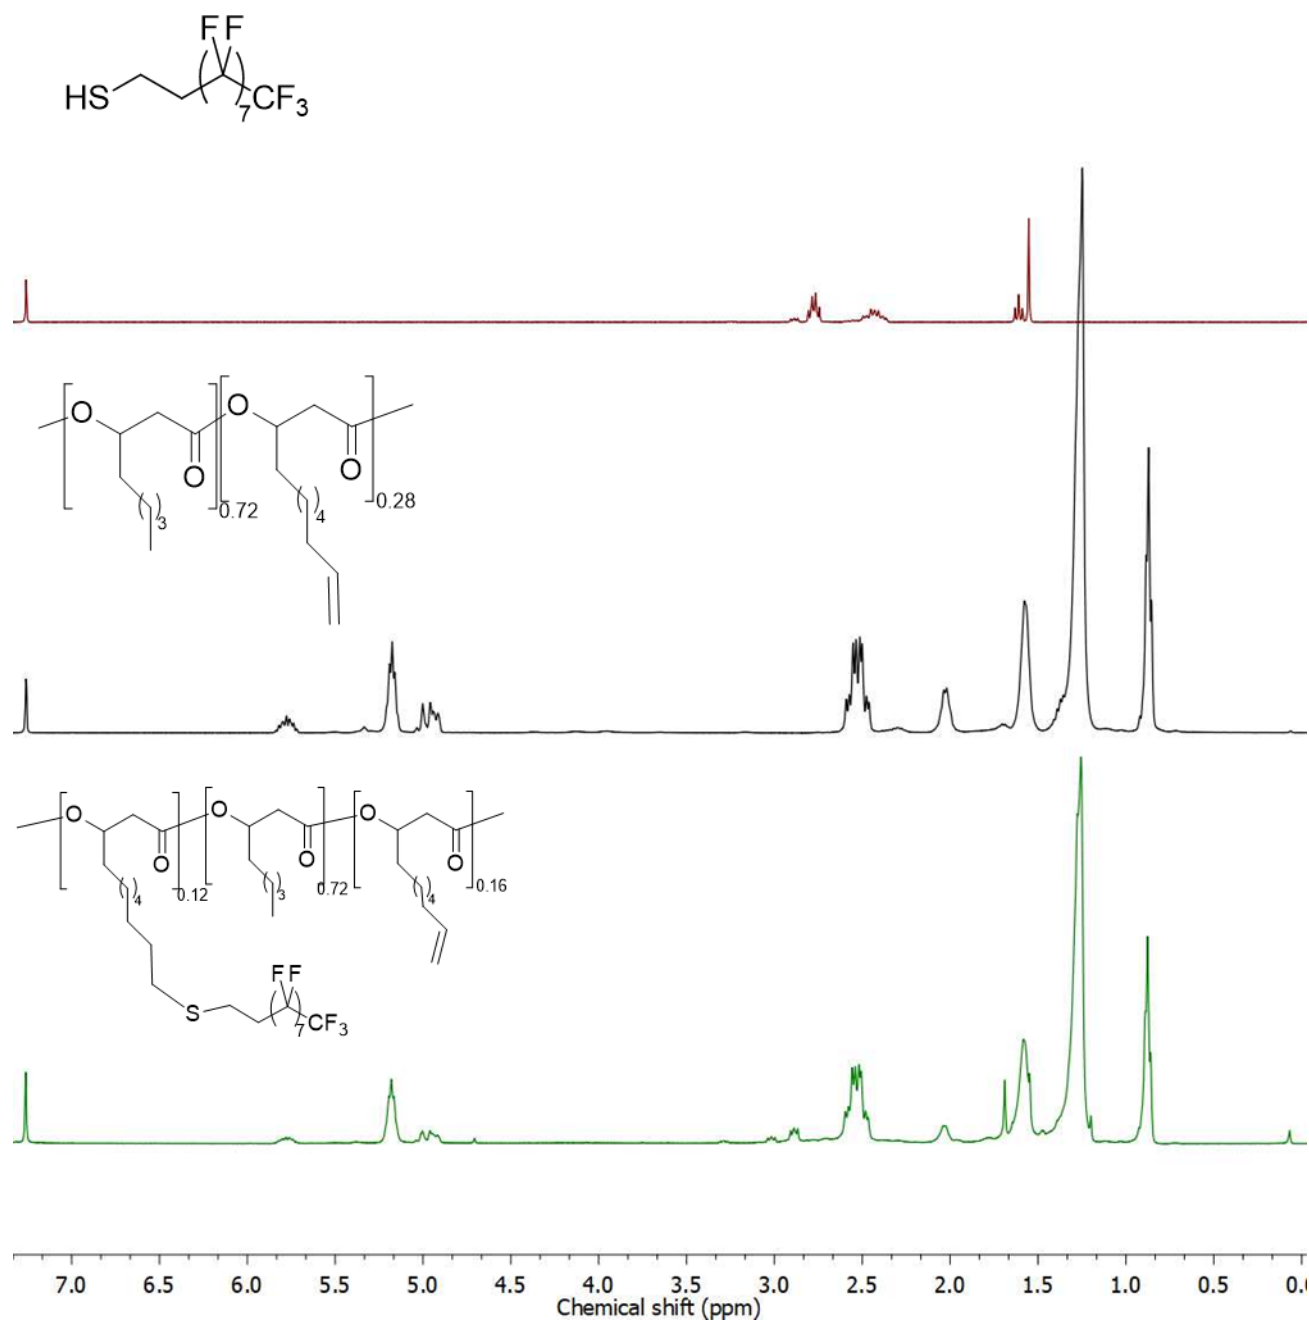

**Figure S2.**  $^1\text{H}$  NMR spectra of  $\text{C}_8\text{F}_{17}$  (red), PHAU (black), and PHAU-g-( $\text{C}_8\text{F}_{17}$ ) (green) in  $\text{CDCl}_3$ .

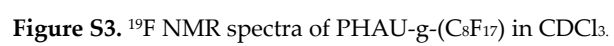

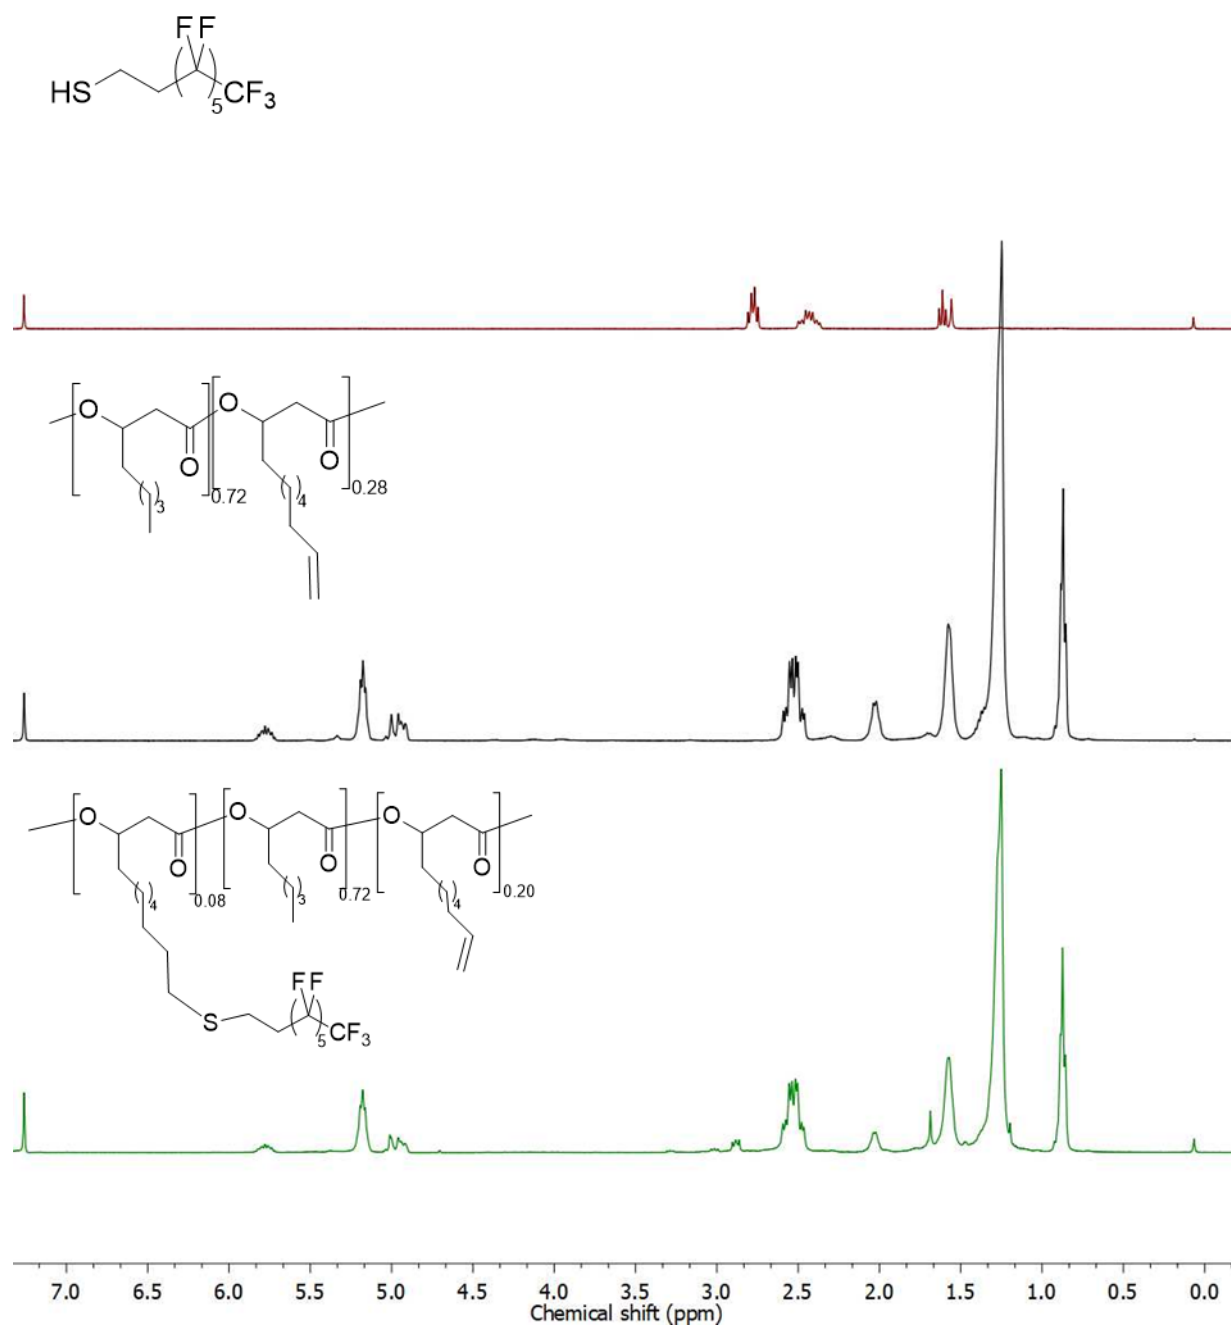

**Figure S4.**  $^1\text{H}$  NMR spectra of  $\text{C}_6\text{F}_{13}$  (red), PHAU (black), and PHAU-g- $(\text{C}_6\text{F}_{13})$  (green) in  $\text{CDCl}_3$ .

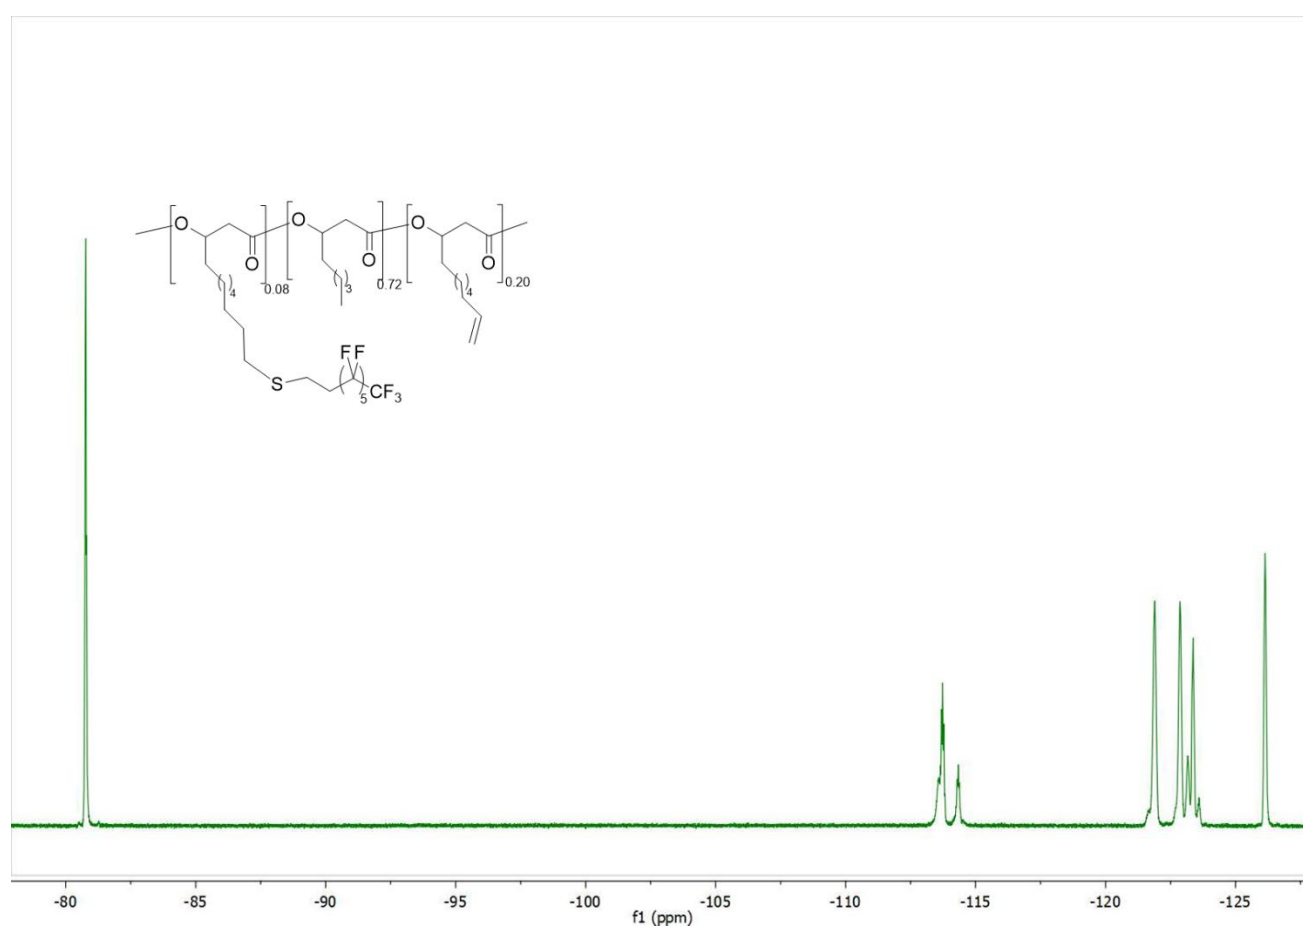

**Figure S5.**  $^{19}\text{F}$  NMR spectra of PHAU-g-( $\text{C}_6\text{F}_{13}$ ) in  $\text{CDCl}_3$ .

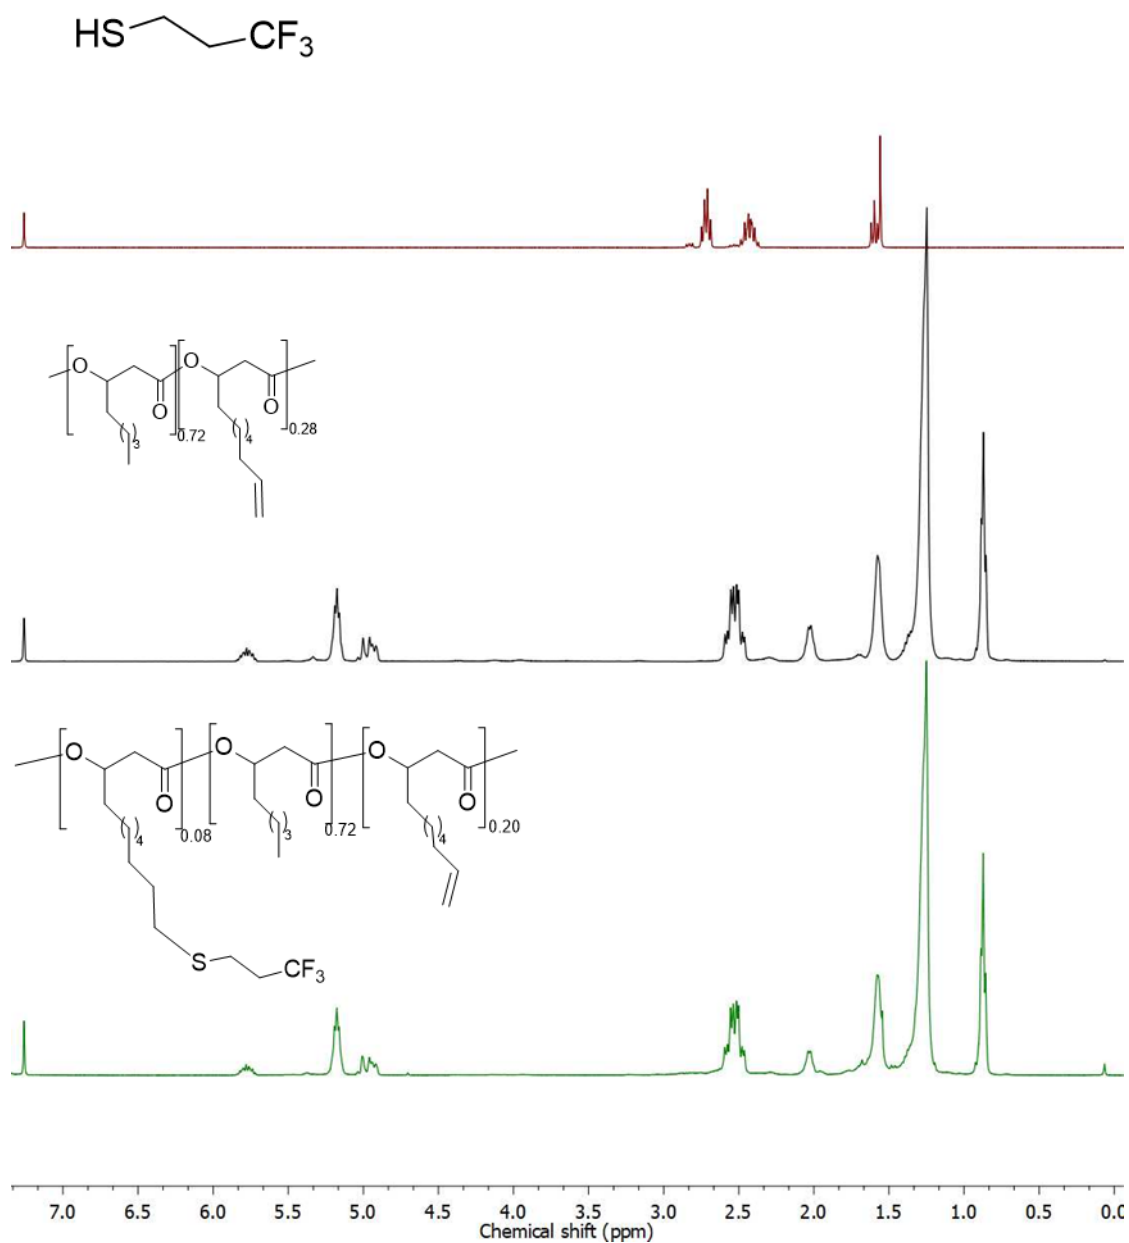

**Figure S6.**  $^1\text{H}$  NMR spectra of  $\text{CF}_3$  (red), PHAU (black), and PHAU-g-( $\text{CF}_3$ ) (green) in  $\text{CDCl}_3$ .

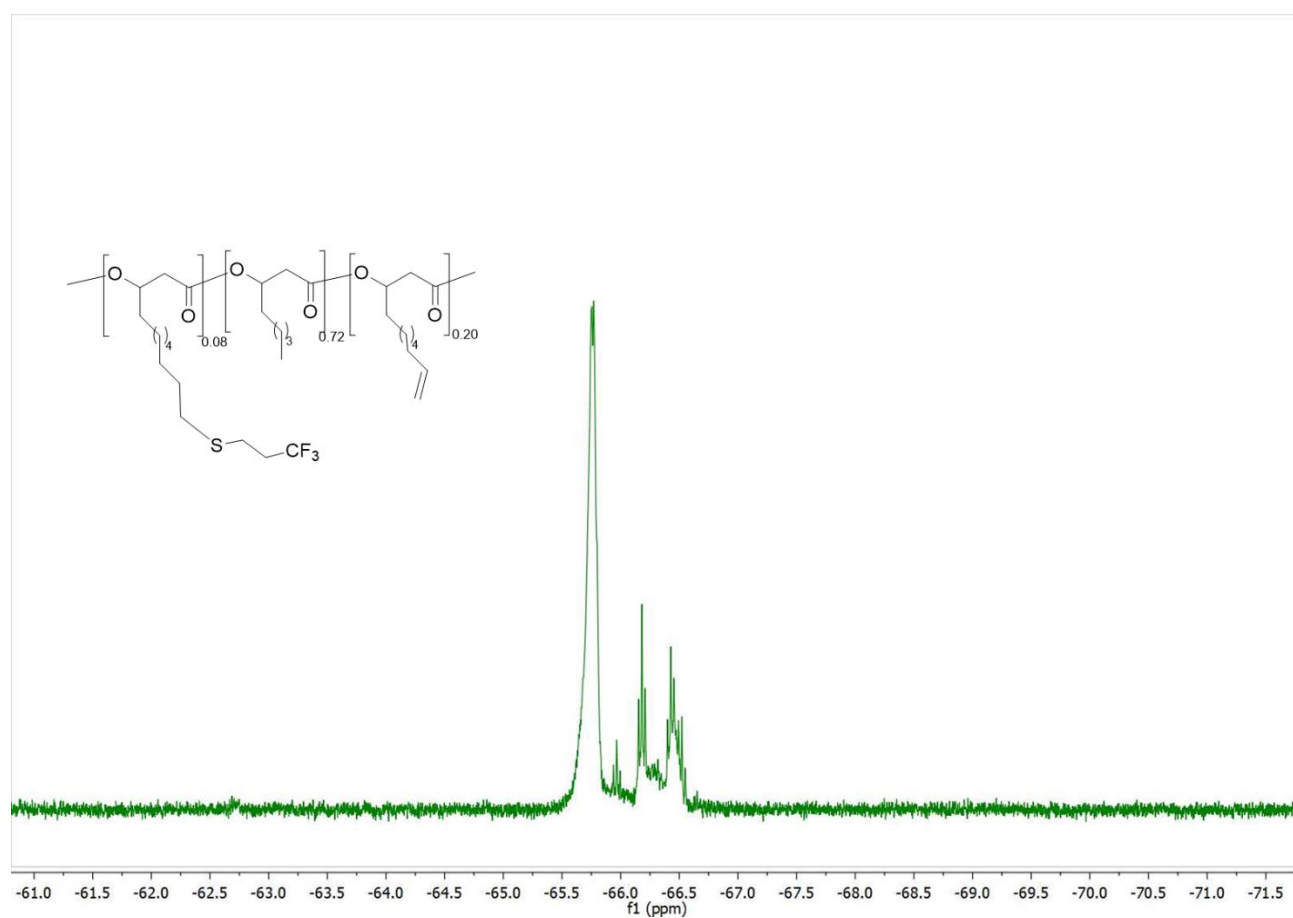

**Figure S7.**  $^{19}\text{F}$  NMR spectra of PHAU-g-( $\text{CF}_3$ ) in  $\text{CDCl}_3$ .
